# Supplementary material for: Enhanced yield and proteomic profile of osteoblast-derived extracellular vesicles from 3D MEW mPCL scaffolds
Source: Royal Society of Chemistry journal article supplement (doi:10.1039/d5tb00021a), 2025-01-01
Supplement: d5tb00021a1.xlsx [file d5tb00021a1.xlsx]

## Sheet: Sheet1
2D 2.6k	2D 2.6k	2D 16k	2D 16k	2D EXO	2D EXO	3T3	3T3	3D 2.6K	3D 2.6K	3D 16k	3D 16k	3D EXO	3D EXO	PCL3T3	PCL3T3
Q9QXS1	Plectin	P11276	Fibronectin	P60710	Actin, cytoplasmic 1	Q8VDD5	Myosin-9	P11276	Fibronectin	P11276	Fibronectin	P11276	Fibronectin	Q8VDD5	Myosin-9
Q8VDD5	Myosin-9	P11087	Collagen alpha-1(I) chain	P63260	Actin, cytoplasmic 2	P11276	Fibronectin	P63260	Actin, cytoplasmic 2	P11499	Heat shock protein HSP 90-beta	P01027	Complement C3	P07356	Annexin A2
P63260	Actin, cytoplasmic 2	P63260	Actin, cytoplasmic 2	P11276	Fibronectin	P63260	Actin, cytoplasmic 2	Q8VDD5	Myosin-9	P01027	Complement C3	Q7TPR4	Alpha-actinin-1	P63260	Actin, cytoplasmic 2
P60710	Actin, cytoplasmic 1	P60710	Actin, cytoplasmic 1	P11087	Collagen alpha-1(I) chain	Q9QXS1	Plectin	P60710	Actin, cytoplasmic 1	P63260	Actin, cytoplasmic 2	P60710	Actin, cytoplasmic 1	P60710	Actin, cytoplasmic 1
P11276	Fibronectin	Q05793	Basement membrane-specific heparan sulfate proteoglycan core protein	P20152	Vimentin	P20152	Vimentin	P68369	Tubulin alpha-1A chain	P60710	Actin, cytoplasmic 1	P57780	Alpha-actinin-4	P20152	Vimentin
Q8BTM8	Filamin-A	Q01149	Collagen alpha-2(I) chain	P63017	Heat shock cognate 71 kDa protein	Q8BTM8	Filamin-A	P05213	Tubulin alpha-1B chain	P07356	Annexin A2	P63260	Actin, cytoplasmic 2	P48678	Prelamin-A/C
P62737	Actin, aortic smooth muscle	P68033	Actin, alpha cardiac muscle 1	P07724	Serum albumin	P68033	Actin, alpha cardiac muscle 1	P68373	Tubulin alpha-1C chain	P52480	Pyruvate kinase PKM	P20152	Vimentin	Q69ZN7	Myoferlin
P68033	Actin, alpha cardiac muscle 1	P68134	Actin, alpha skeletal muscle	P26041	Moesin	P62737	Actin, aortic smooth muscle	P20152	Vimentin	P07901	Heat shock protein HSP 90-alpha	Q6IRU2	Tropomyosin alpha-4 chain	Q60932	Voltage-dependent anion-selective channel protein 1
P20152	Vimentin	P20152	Vimentin	P11499	Heat shock protein HSP 90-beta	P68134	Actin, alpha skeletal muscle	P68134	Actin, alpha skeletal muscle	P68033	Actin, alpha cardiac muscle 1	P28653	Biglycan	P99024	Tubulin beta-5 chain
Q80X90	Filamin-B	P62737	Actin, aortic smooth muscle	P68134	Actin, alpha skeletal muscle	P05213	Tubulin alpha-1B chain	P68033	Actin, alpha cardiac muscle 1	P68134	Actin, alpha skeletal muscle	P63017	Heat shock cognate 71 kDa protein	P63038	60 kDa heat shock protein, mitochondrial
P10126	Elongation factor 1-alpha 1	P63268	Actin, gamma-enteric smooth muscle	P68033	Actin, alpha cardiac muscle 1	P68369	Tubulin alpha-1A chain	P62737	Actin, aortic smooth muscle	P63268	Actin, gamma-enteric smooth muscle	P07724	Serum albumin	P20029	Endoplasmic reticulum chaperone BiP
P99024	Tubulin beta-5 chain	P58252	Elongation factor 2	P63268	Actin, gamma-enteric smooth muscle	P99024	Tubulin beta-5 chain	P63268	Actin, gamma-enteric smooth muscle	P62737	Actin, aortic smooth muscle	Q8VDD5	Myosin-9	P56480	ATP synthase subunit beta, mitochondrial
Q68FD5	Clathrin heavy chain 1	Q8VDD5	Myosin-9	P62737	Actin, aortic smooth muscle	Q68FD5	Clathrin heavy chain 1	P10126	Elongation factor 1-alpha 1	P20152	Vimentin	P68134	Actin, alpha skeletal muscle	P68373	Tubulin alpha-1C chain
P68372	Tubulin beta-4B chain	P10126	Elongation factor 1-alpha 1	P62259	14-3-3 protein epsilon	P63268	Actin, gamma-enteric smooth muscle	P11499	Heat shock protein HSP 90-beta	Q8VDD5	Myosin-9	P68033	Actin, alpha cardiac muscle 1	Q9D379	Epoxide hydrolase 1
P11499	Heat shock protein HSP 90-beta	P11499	Heat shock protein HSP 90-beta	P16045	Galectin-1	P68373	Tubulin alpha-1C chain	P07356	Annexin A2	P10126	Elongation factor 1-alpha 1	P63268	Actin, gamma-enteric smooth muscle	P10126	Elongation factor 1-alpha 1
P05213	Tubulin alpha-1B chain	P52480	Pyruvate kinase PKM	Q6IRU2	Tropomyosin alpha-4 chain	P11499	Heat shock protein HSP 90-beta	P99024	Tubulin beta-5 chain	P63017	Heat shock cognate 71 kDa protein	P62737	Actin, aortic smooth muscle	Q8CGP2	Histone H2B type 1-P
Q7TMM9	Tubulin beta-2A chain	P63017	Heat shock cognate 71 kDa protein	P07901	Heat shock protein HSP 90-alpha	P10126	Elongation factor 1-alpha 1	P16858	Glyceraldehyde-3-phosphate dehydrogenase	P16858	Glyceraldehyde-3-phosphate dehydrogenase	P63101	14-3-3 protein zeta/delta	Q6ZWY9	Histone H2B type 1-C/E/G
Q9CWF2	Tubulin beta-2B chain	P07356	Annexin A2	P58771	Tropomyosin alpha-1 chain	P05214	Tubulin alpha-3 chain	P68372	Tubulin beta-4B chain	P10107	Annexin A1	P52480	Pyruvate kinase PKM	Q64525	Histone H2B type 2-B
Q7TMM9	Tubulin beta-2A chain	Q8BTM8	Filamin-A	P58252	Elongation factor 2	P07356	Annexin A2	P56480	ATP synthase subunit beta, mitochondrial	P08113	Endoplasmin	Q61207	Prosaposin	Q64478	Histone H2B type 1-H
Q05793	Basement membrane-specific heparan sulfate proteoglycan core protein	P99024	Tubulin beta-5 chain	Q7TPR4	Alpha-actinin-1	Q9CWF2	Tubulin beta-2B chain	P07901	Heat shock protein HSP 90-alpha	P20029	Endoplasmic reticulum chaperone BiP	P26041	Moesin	P10854	Histone H2B type 1-M
P68373	Tubulin alpha-1C chain	Q80X90	Filamin-B	P63101	14-3-3 protein zeta/delta	Q7TMM9	Tubulin beta-2A chain	P20029	Endoplasmic reticulum chaperone BiP	P07724	Serum albumin	Q61147	Ceruloplasmin	Q8CGP1	Histone H2B type 1-K
P68369	Tubulin alpha-1A chain	Q61554	Fibrillin-1	Q64727	Vinculin	P56480	ATP synthase subunit beta, mitochondrial	P63038	60 kDa heat shock protein, mitochondrial	P06151	L-lactate dehydrogenase A chain	P62259	14-3-3 protein epsilon	Q64475	Histone H2B type 1-B
P62806	Histone H4	P27661	Histone H2AX	Q01768	Nucleoside diphosphate kinase B	P62806	Histone H4	P10107	Annexin A1	P17182	Alpha-enolase	P97298	Pigment epithelium-derived factor	P10853	Histone H2B type 1-F/J/L
P48678	Prelamin-A/C	P62806	Histone H4	P08113	Endoplasmin	Q03265	ATP synthase subunit alpha, mitochondrial	Q8BTM8	Filamin-A	P08003	Protein disulfide-isomerase A4	P05064	Fructose-bisphosphate aldolase A	P05213	Tubulin alpha-1B chain
P26039	Talin-1	Q6ZWY9	Histone H2B type 1-C/E/G	P57780	Alpha-actinin-4	P48962	ADP/ATP translocase 1	P62806	Histone H4	Q01853	Transitional endoplasmic reticulum ATPase	P09103	Protein disulfide-isomerase	P68369	Tubulin alpha-1A chain
P58252	Elongation factor 2	Q8CGP2	Histone H2B type 1-P	P07214	SPARC	P27661	Histone H2AX	Q60932	Voltage-dependent anion-selective channel protein 1	P68369	Tubulin alpha-1A chain	Q02819	Nucleobindin-1	P10107	Annexin A1
P16858	Glyceraldehyde-3-phosphate dehydrogenase	Q8CGP1	Histone H2B type 1-K	P52480	Pyruvate kinase PKM	Q6ZWY9	Histone H2B type 1-C/E/G	Q68FD5	Clathrin heavy chain 1	P68373	Tubulin alpha-1C chain	P58771	Tropomyosin alpha-1 chain	P48962	ADP/ATP translocase 1
P16546	Spectrin alpha chain, non-erythrocytic 1	Q64475	Histone H2B type 1-B	P06151	L-lactate dehydrogenase A chain	Q64525	Histone H2B type 2-B	P48678	Prelamin-A/C	P05213	Tubulin alpha-1B chain	P20029	Endoplasmic reticulum chaperone BiP	Q60930	Voltage-dependent anion-selective channel protein 2
Q8VHX6	Filamin-C	P10853	Histone H2B type 1-F/J/L	P09103	Protein disulfide-isomerase	Q64478	Histone H2B type 1-H	Q03265	ATP synthase subunit alpha, mitochondrial	P62259	14-3-3 protein epsilon	P61982	14-3-3 protein gamma	P68134	Actin, alpha skeletal muscle
P05214	Tubulin alpha-3 chain	Q64525	Histone H2B type 2-B	Q61207	Prosaposin	P10854	Histone H2B type 1-M	P09405	Nucleolin	Q61207	Prosaposin	P28654	Decorin	P68033	Actin, alpha cardiac muscle 1
P10107	Annexin A1	Q64478	Histone H2B type 1-H	P61982	14-3-3 protein gamma	Q8CGP1	Histone H2B type 1-K	P48962	ADP/ATP translocase 1	Q8BTM8	Filamin-A	P06151	L-lactate dehydrogenase A chain	P97429	Annexin A4
Q62261	Spectrin beta chain, non-erythrocytic 1	P10854	Histone H2B type 1-M	P58774	Tropomyosin beta chain	Q64475	Histone H2B type 1-B	P48036	Annexin A5	Q8CGP2	Histone H2B type 1-P	P58252	Elongation factor 2	P16858	Glyceraldehyde-3-phosphate dehydrogenase
P84228	Histone H3.2	Q6ZWY9	Histone H2B type 1-C/E/G	P14211	Calreticulin	P10853	Histone H2B type 1-F/J/L	P17182	Alpha-enolase	Q8CGP1	Histone H2B type 1-K	Q9DBJ1	Phosphoglycerate mutase 1	P63268	Actin, gamma-enteric smooth muscle
Q922F4	Tubulin beta-6 chain	Q8CGP2	Histone H2B type 1-P	P27773	Protein disulfide-isomerase A3	Q61879	Myosin-10	P08113	Endoplasmin	Q6ZWY9	Histone H2B type 1-C/E/G	P07141	Macrophage colony-stimulating factor 1	P62737	Actin, aortic smooth muscle
P52480	Pyruvate kinase PKM	Q8CGP1	Histone H2B type 1-K	P68510	14-3-3 protein eta	P84228	Histone H3.2	Q80X90	Filamin-B	Q64525	Histone H2B type 2-B	Q64727	Vinculin	P68368	Tubulin alpha-4A chain
P63038	60 kDa heat shock protein, mitochondrial	Q64475	Histone H2B type 1-B	P15532	Nucleoside diphosphate kinase A	Q9JJZ2	Tubulin alpha-8 chain	P14069	Protein S100-A6	Q64478	Histone H2B type 1-H	P09411	Phosphoglycerate kinase 1	Q03265	ATP synthase subunit alpha, mitochondrial
Q8CGP2	Histone H2B type 1-P	P10853	Histone H2B type 1-F/J/L	P21107	Tropomyosin alpha-3 chain	Q64522	Histone H2A type 2-B	Q9DCN2	NADH-cytochrome b5 reductase 3	Q64475	Histone H2B type 1-B	Q01768	Nucleoside diphosphate kinase B	Q62465	Synaptic vesicle membrane protein VAT-1 homolog
Q8CGP1	Histone H2B type 1-K	Q64525	Histone H2B type 2-B	P0DP28	Calmodulin-3	Q8CGP2	Histone H2B type 1-P	P38647	Stress-70 protein, mitochondrial	P10854	Histone H2B type 1-M	Q8VHY0	Chondroitin sulfate proteoglycan 4	P08249	Malate dehydrogenase, mitochondrial
Q64525	Histone H2B type 2-B	Q64478	Histone H2B type 1-H	P0DP27	Calmodulin-2	Q8CGP1	Histone H2B type 1-K	P21550	Beta-enolase	P10853	Histone H2B type 1-F/J/L	P58774	Tropomyosin beta chain	P63017	Heat shock cognate 71 kDa protein
Q64478	Histone H2B type 1-H	P10854	Histone H2B type 1-M	P0DP26	Calmodulin-1	Q64475	Histone H2B type 1-B	Q9D379	Epoxide hydrolase 1	P63101	14-3-3 protein zeta/delta	P21107	Tropomyosin alpha-3 chain	P52480	Pyruvate kinase PKM
Q64475	Histone H2B type 1-B	P62806	Histone H4	Q9CQV8	14-3-3 protein beta/alpha	P10853	Histone H2B type 1-F/J/L	P63017	Heat shock cognate 71 kDa protein	P58252	Elongation factor 2	P27773	Protein disulfide-isomerase A3	P35700	Peroxiredoxin-1
P10854	Histone H2B type 1-M	Q9QXS1	Plectin	P68254	14-3-3 protein theta	P17182	Alpha-enolase	Q64523	Histone H2A type 2-C	Q62465	Synaptic vesicle membrane protein VAT-1 homolog	P11087	Collagen alpha-1(I) chain	P62806	Histone H4
P10853	Histone H2B type 1-F/J/L	Q6GSS7	Histone H2A type 2-A	P05064	Fructose-bisphosphate aldolase A	P08113	Endoplasmin	Q64522	Histone H2A type 2-B	P26041	Moesin	P17182	Alpha-enolase	P48036	Annexin A5
Q6ZWY9	Histone H2B type 1-C/E/G	Q64523	Histone H2A type 2-C	Q9DBJ1	Phosphoglycerate mutase 1	Q9D8E6	60S ribosomal protein L4	P11438	Lysosome-associated membrane glycoprotein 1	P05064	Fructose-bisphosphate aldolase A	P10605	Cathepsin B	Q8VEM8	Phosphate carrier protein, mitochondrial
Q64525	Histone H2B type 2-B	Q64522	Histone H2A type 2-B	P17182	Alpha-enolase	P19324	Serpin H1	Q6GSS7	Histone H2A type 2-A	Q9D2U9	Histone H2B type 3-A	Q9CQV8	14-3-3 protein beta/alpha	P51881	ADP/ATP translocase 2
Q64478	Histone H2B type 1-H	O88322	Nidogen-2	Q920A5	Retinoid-inducible serine carboxypeptidase	P51881	ADP/ATP translocase 2	Q64523	Histone H2A type 2-C	Q8CGP0	Histone H2B type 3-B	P07214	SPARC	P08113	Endoplasmin
P10854	Histone H2B type 1-M	P05213	Tubulin alpha-1B chain	P48678	Prelamin-A/C	Q6GSS7	Histone H2A type 2-A	Q64522	Histone H2A type 2-B	Q64524	Histone H2B type 2-E	Q6GQT1	Alpha-2-macroglobulin-P	P35564	Calnexin
P07356	Annexin A2	Q7TPR4	Alpha-actinin-1	Q62465	Synaptic vesicle membrane protein VAT-1 homolog	Q64523	Histone H2A type 2-C	Q64525	Histone H2B type 2-B	P99024	Tubulin beta-5 chain	P07356	Annexin A2	P16045	Galectin-1
P38647	Stress-70 protein, mitochondrial	P16858	Glyceraldehyde-3-phosphate dehydrogenase	P14069	Protein S100-A6	P16858	Glyceraldehyde-3-phosphate dehydrogenase	Q8CGP2	Histone H2B type 1-P	Q7TPR4	Alpha-actinin-1	Q8BTM8	Filamin-A	P11438	Lysosome-associated membrane glycoprotein 1
Q9JHU4	Cytoplasmic dynein 1 heavy chain 1	Q01853	Transitional endoplasmic reticulum ATPase	P08249	Malate dehydrogenase, mitochondrial	P14869	60S acidic ribosomal protein P0	Q8CGP1	Histone H2B type 1-K	P68254	14-3-3 protein theta	P0DP28	Calmodulin-3	P17182	Alpha-enolase
P48962	ADP/ATP translocase 1	Q9D2U9	Histone H2B type 3-A	P99026	Proteasome subunit beta type-4	P68433	Histone H3.1	Q6ZWY9	Histone H2B type 1-C/E/G	P09411	Phosphoglycerate kinase 1	P0DP27	Calmodulin-2	P07901	Heat shock protein HSP 90-alpha
Q9JJZ2	Tubulin alpha-8 chain	Q8CGP0	Histone H2B type 3-B	P62962	Profilin-1	Q9D2U9	Histone H2B type 3-A	Q64478	Histone H2B type 1-H	Q9DBJ1	Phosphoglycerate mutase 1	P0DP26	Calmodulin-1	Q60931	Voltage-dependent anion-selective channel protein 3
Q9WTI7	Unconventional myosin-Ic	Q64524	Histone H2B type 2-E	P40124	Adenylyl cyclase-associated protein 1	Q8CGP0	Histone H2B type 3-B	Q64475	Histone H2B type 1-B	Q61147	Ceruloplasmin	P48678	Prelamin-A/C	P11499	Heat shock protein HSP 90-beta
P47738	Aldehyde dehydrogenase, mitochondrial	P07901	Heat shock protein HSP 90-alpha	P07356	Annexin A2	Q7TPV4	Myb-binding protein 1A	P10854	Histone H2B type 1-M	P97298	Pigment epithelium-derived factor	Q91ZX7	Prolow-density lipoprotein receptor-related protein 1	Q64133	Amine oxidase [flavin-containing] A
Q8CGP7	Histone H2A type 1-K	P68369	Tubulin alpha-1A chain	Q01149	Collagen alpha-2(I) chain	P27659	60S ribosomal protein L3	P10853	Histone H2B type 1-F/J/L	Q64727	Vinculin	P16045	Galectin-1	Q60605	Myosin light polypeptide 6
Q8CGP6	Histone H2A type 1-H	P48678	Prelamin-A/C	Q61508	Extracellular matrix protein 1	P52480	Pyruvate kinase PKM	P47738	Aldehyde dehydrogenase, mitochondrial	Q80X90	Filamin-B	P26040	Ezrin	P39876	Metalloproteinase inhibitor 3
Q8CGP5	Histone H2A type 1-F	P06151	L-lactate dehydrogenase A chain	P17742	Peptidyl-prolyl cis-trans isomerase A	Q80X90	Filamin-B	P21981	Protein-glutamine gamma-glutamyltransferase 2	Q05793	Basement membrane-specific heparan sulfate proteoglycan core protein	Q61805	Lipopolysaccharide-binding protein	Q68FD5	Clathrin heavy chain 1
Q8BFU2	Histone H2A type 3	Q68FD5	Clathrin heavy chain 1	Q9QUM9	Proteasome subunit alpha type-6	P63038	60 kDa heat shock protein, mitochondrial	Q69ZN7	Myoferlin	P58774	Tropomyosin beta chain	Q01853	Transitional endoplasmic reticulum ATPase	P09103	Protein disulfide-isomerase
Q64523	Histone H2A type 2-C	P28654	Decorin	P18242	Cathepsin D	P62908	40S ribosomal protein S3	Q9EQU5	Protein SET	Q9CWF2	Tubulin beta-2B chain	P08249	Malate dehydrogenase, mitochondrial	P09411	Phosphoglycerate kinase 1
C0HKE9	Histone H2A type 1-P	P17182	Alpha-enolase	Q02819	Nucleobindin-1	P38647	Stress-70 protein, mitochondrial	Q8R1M2	Histone H2A.J	Q7TMM9	Tubulin beta-2A chain	Q9R1P4	Proteasome subunit alpha type-1	Q9DBJ1	Phosphoglycerate mutase 1
C0HKE8	Histone H2A type 1-O	P26041	Moesin	Q9Z2U1	Proteasome subunit alpha type-5	P10107	Annexin A1	Q8CGP7	Histone H2A type 1-K	P68372	Tubulin beta-4B chain	P55065	Phospholipid transfer protein	P63101	14-3-3 protein zeta/delta
C0HKE7	Histone H2A type 1-N	P28653	Biglycan	Q6GQT1	Alpha-2-macroglobulin-P	P14148	60S ribosomal protein L7	Q8CGP6	Histone H2A type 1-H	P16045	Galectin-1	P17751	Triosephosphate isomerase	P02089	Hemoglobin subunit beta-2
C0HKE6	Histone H2A type 1-I	P05214	Tubulin alpha-3 chain	Q99PT1	Rho GDP-dissociation inhibitor 1	Q922U2	Keratin, type II cytoskeletal 5	Q8CGP5	Histone H2A type 1-F	P18760	Cofilin-1	P49722	Proteasome subunit alpha type-2	P02088	Hemoglobin subunit beta-1
C0HKE5	Histone H2A type 1-G	P10107	Annexin A1	P10605	Cathepsin B	P04104	Keratin, type II cytoskeletal 1	Q8BFU2	Histone H2A type 3	P10605	Cathepsin B	O55234	Proteasome subunit beta type-5	P17742	Peptidyl-prolyl cis-trans isomerase A
C0HKE4	Histone H2A type 1-E	Q61508	Extracellular matrix protein 1	O70435	Proteasome subunit alpha type-3	P47911	60S ribosomal protein L6	C0HKE9	Histone H2A type 1-P	P62806	Histone H4	Q9Z2U0	Proteasome subunit alpha type-7	O54734	Dolichyl-diphosphooligosaccharide--protein glycosyltransferase 48 kDa subunit
C0HKE3	Histone H2A type 1-D	P84228	Histone H3.2	P14152	Malate dehydrogenase, cytoplasmic	P47738	Aldehyde dehydrogenase, mitochondrial	C0HKE8	Histone H2A type 1-O	P11438	Lysosome-associated membrane glycoprotein 1	P11438	Lysosome-associated membrane glycoprotein 1	P01942	Hemoglobin subunit alpha
C0HKE2	Histone H2A type 1-C	P57780	Alpha-actinin-4	P26350	Prothymosin alpha	P48678	Prelamin-A/C	C0HKE7	Histone H2A type 1-N	P07214	SPARC	O09061	Proteasome subunit beta type-1	P62908	40S ribosomal protein S3
C0HKE1	Histone H2A type 1-B	Q62261	Spectrin beta chain, non-erythrocytic 1	P35700	Peroxiredoxin-1	P25444	40S ribosomal protein S2	C0HKE6	Histone H2A type 1-I	P02535	Keratin, type I cytoskeletal 10	P16858	Glyceraldehyde-3-phosphate dehydrogenase	Q9DCX2	ATP synthase subunit d, mitochondrial
Q6GSS7	Histone H2A type 2-A	Q640N1	Adipocyte enhancer-binding protein 1	Q60854	Serpin B6	P51150	Ras-related protein Rab-7a	C0HKE5	Histone H2A type 1-G	Q5U405	Transmembrane protease serine 13	P26443	Glutamate dehydrogenase 1, mitochondrial	P14211	Calreticulin
Q64523	Histone H2A type 2-C	Q64727	Vinculin	Q9R1P1	Proteasome subunit beta type-3	P68040	Receptor of activated protein C kinase 1	C0HKE4	Histone H2A type 1-E	P68510	14-3-3 protein eta	P18242	Cathepsin D	P0DP28	Calmodulin-3
Q03265	ATP synthase subunit alpha, mitochondrial	Q9QZF2	Glypican-1	P61089	Ubiquitin-conjugating enzyme E2 N	Q9D8N0	Elongation factor 1-gamma	C0HKE3	Histone H2A type 1-D	P57780	Alpha-actinin-4	Q99K51	Plastin-3	P0DP27	Calmodulin-2
P19324	Serpin H1	Q9JKF1	Ras GTPase-activating-like protein IQGAP1	P55065	Phospholipid transfer protein	Q8CGC7	Bifunctional glutamate/proline--tRNA ligase	C0HKE2	Histone H2A type 1-C	Q01149	Collagen alpha-2(I) chain	Q9QUM9	Proteasome subunit alpha type-6	P0DP26	Calmodulin-1
P63017	Heat shock cognate 71 kDa protein	P16045	Galectin-1	Q61316	Heat shock 70 kDa protein 4	Q8VHX6	Filamin-C	C0HKE1	Histone H2A type 1-B	P84078	ADP-ribosylation factor 1	P68373	Tubulin alpha-1C chain	P38647	Stress-70 protein, mitochondrial
P27661	Histone H2AX	Q920A5	Retinoid-inducible serine carboxypeptidase	P17751	Triosephosphate isomerase	P84244	Histone H3.3	P27661	Histone H2AX	P61205	ADP-ribosylation factor 3	P68369	Tubulin alpha-1A chain	Q8R1M2	Histone H2A.J
Q8R1M2	Histone H2A.J	P56480	ATP synthase subunit beta, mitochondrial	Q9D0J8	Parathymosin	P02301	Histone H3.3C	P63158	High mobility group protein B1	P62962	Profilin-1	P05214	Tubulin alpha-3 chain	Q8CGP7	Histone H2A type 1-K
P68433	Histone H3.1	P35700	Peroxiredoxin-1	P09411	Phosphoglycerate kinase 1	P12970	60S ribosomal protein L7a	Q64727	Vinculin	P28653	Biglycan	P05213	Tubulin alpha-1B chain	Q8CGP6	Histone H2A type 1-H
P07901	Heat shock protein HSP 90-alpha	Q61207	Prosaposin	Q91W10	Zinc transporter ZIP8	P20029	Endoplasmic reticulum chaperone BiP	Q01853	Transitional endoplasmic reticulum ATPase	P27773	Protein disulfide-isomerase A3	Q8CG16	Complement C1r-A subcomponent	Q8CGP5	Histone H2A type 1-F
Q64522	Histone H2A type 2-B	P05064	Fructose-bisphosphate aldolase A	Q62000	Mimecan	P47962	60S ribosomal protein L5	P68254	14-3-3 protein theta	P06745	Glucose-6-phosphate isomerase	Q9R1P0	Proteasome subunit alpha type-4	Q8BFU2	Histone H2A type 3
P51881	ADP/ATP translocase 2	P63101	14-3-3 protein zeta/delta	Q9QYB1	Chloride intracellular channel protein 4	P02535	Keratin, type I cytoskeletal 10	Q9CXW4	60S ribosomal protein L11	P14211	Calreticulin	P33434	72 kDa type IV collagenase	Q6GSS7	Histone H2A type 2-A
P56480	ATP synthase subunit beta, mitochondrial	P19324	Serpin H1	Q60817	Nascent polypeptide-associated complex subunit alpha	Q9DCN2	NADH-cytochrome b5 reductase 3	Q61937	Nucleophosmin	Q8R1M2	Histone H2A.J	Q61508	Extracellular matrix protein 1	Q64523	Histone H2A type 2-C
P62908	40S ribosomal protein S3	P48036	Annexin A5	P70670	Nascent polypeptide-associated complex subunit alpha, muscle-specific form	P62702	40S ribosomal protein S4, X isoform	P58771	Tropomyosin alpha-1 chain	Q8CGP7	Histone H2A type 1-K	P25785	Metalloproteinase inhibitor 2	C0HKE9	Histone H2A type 1-P
P84244	Histone H3.3	P09411	Phosphoglycerate kinase 1			P62754	40S ribosomal protein S6	P35564	Calnexin	Q8CGP6	Histone H2A type 1-H	Q9QXS1	Plectin	C0HKE8	Histone H2A type 1-O
P02301	Histone H3.3C	Q62465	Synaptic vesicle membrane protein VAT-1 homolog			P61255	60S ribosomal protein L26	P62984	Ubiquitin-60S ribosomal protein L40	Q8CGP5	Histone H2A type 1-F	P40240	CD9 antigen	C0HKE7	Histone H2A type 1-N
P14148	60S ribosomal protein L7	P09405	Nucleolin			P62827	GTP-binding nuclear protein Ran	P62983	Ubiquitin-40S ribosomal protein S27a	Q8BFU2	Histone H2A type 3	Q5U405	Transmembrane protease serine 13	C0HKE6	Histone H2A type 1-I
P43277	Histone H1.3	P08113	Endoplasmin			P15864	Histone H1.2	P0CG50	Polyubiquitin-C	P27661	Histone H2AX			C0HKE5	Histone H2A type 1-G
P21981	Protein-glutamine gamma-glutamyltransferase 2	P07724	Serum albumin			P43277	Histone H1.3	P0CG49	Polyubiquitin-B	C0HKE9	Histone H2A type 1-P			C0HKE4	Histone H2A type 1-E
Q9JKF1	Ras GTPase-activating-like protein IQGAP1	P68433	Histone H3.1			P07724	Serum albumin	Q61207	Prosaposin	C0HKE8	Histone H2A type 1-O			C0HKE3	Histone H2A type 1-D
P60843	Eukaryotic initiation factor 4A-I	P21981	Protein-glutamine gamma-glutamyltransferase 2			Q8VED5	Keratin, type II cytoskeletal 79	Q8BMK4	Cytoskeleton-associated protein 4	C0HKE7	Histone H2A type 1-N			C0HKE2	Histone H2A type 1-C
P23116	Eukaryotic translation initiation factor 3 subunit A	P14869	60S acidic ribosomal protein P0			P70696	Histone H2B type 1-A	P01942	Hemoglobin subunit alpha	C0HKE6	Histone H2A type 1-I			C0HKE1	Histone H2A type 1-B
Q61753	D-3-phosphoglycerate dehydrogenase	P70168	Importin subunit beta-1			P62270	40S ribosomal protein S18	P17047	Lysosome-associated membrane glycoprotein 2	C0HKE5	Histone H2A type 1-G			P27661	Histone H2AX
Q9D8E6	60S ribosomal protein L4	P80314	T-complex protein 1 subunit beta			P43276	Histone H1.5	Q8VEM8	Phosphate carrier protein, mitochondrial	C0HKE4	Histone H2A type 1-E			Q61207	Prosaposin
Q7TPR4	Alpha-actinin-1	P33434	72 kDa type IV collagenase			P62242	40S ribosomal protein S8	P09103	Protein disulfide-isomerase	C0HKE3	Histone H2A type 1-D			Q91YQ5	Dolichyl-diphosphooligosaccharide--protein glycosyltransferase subunit 1
Q91VI7	Ribonuclease inhibitor	P55065	Phospholipid transfer protein			P27773	Protein disulfide-isomerase A3	P52480	Pyruvate kinase PKM	C0HKE2	Histone H2A type 1-C			Q9DB20	ATP synthase subunit O, mitochondrial
P12970	60S ribosomal protein L7a	P26039	Talin-1			P51410	60S ribosomal protein L9	Q8VEK3	Heterogeneous nuclear ribonucleoprotein U	C0HKE1	Histone H2A type 1-B			Q3THE2	Myosin regulatory light chain 12B
P47963	60S ribosomal protein L13	Q61398	Procollagen C-endopeptidase enhancer 1			Q9D0K2	Succinyl-CoA:3-ketoacid coenzyme A transferase 1, mitochondrial	P58252	Elongation factor 2	Q920A5	Retinoid-inducible serine carboxypeptidase			P47738	Aldehyde dehydrogenase, mitochondrial
P47911	60S ribosomal protein L6	P18760	Cofilin-1			P41105	60S ribosomal protein L28	P84228	Histone H3.2	Q9CQV8	14-3-3 protein beta/alpha			P19324	Serpin H1
Q6ZWN5	40S ribosomal protein S9	P14069	Protein S100-A6			P62821	Ras-related protein Rab-1A	Q91VR2	ATP synthase subunit gamma, mitochondrial	P61982	14-3-3 protein gamma			P06151	L-lactate dehydrogenase A chain
P62270	40S ribosomal protein S18	Q61937	Nucleophosmin			P58252	Elongation factor 2	Q6ZWN5	40S ribosomal protein S9	Q8BSL7	ADP-ribosylation factor 2			Q64522	Histone H2A type 2-B
P14869	60S acidic ribosomal protein P0	Q6ZQ38	Cullin-associated NEDD8-dissociated protein 1			P80313	T-complex protein 1 subunit eta	P25444	40S ribosomal protein S2	P84084	ADP-ribosylation factor 5			P27773	Protein disulfide-isomerase A3
P43274	Histone H1.4	P62962	Profilin-1			P62962	Profilin-1			P48036	Annexin A5			Q99P72	Reticulon-4
P15864	Histone H1.2	Q9WTI7	Unconventional myosin-Ic			P62918	60S ribosomal protein L8			Q9JKF1	Ras GTPase-activating-like protein IQGAP1			P12787	Cytochrome c oxidase subunit 5A, mitochondrial
P25444	40S ribosomal protein S2	P47962	60S ribosomal protein L5			P62852	40S ribosomal protein S25			Q9WV54	Acid ceramidase			Q9CZ13	Cytochrome b-c1 complex subunit 1, mitochondrial
P57780	Alpha-actinin-4	P62259	14-3-3 protein epsilon			P63017	Heat shock cognate 71 kDa protein			P09103	Protein disulfide-isomerase			Q9DCN2	NADH-cytochrome b5 reductase 3
P70168	Importin subunit beta-1	P40124	Adenylyl cyclase-associated protein 1			P08074	Carbonyl reductase [NADPH] 2			P97429	Annexin A4			Q9DB77	Cytochrome b-c1 complex subunit 2, mitochondrial
P35980	60S ribosomal protein L18	P14206	40S ribosomal protein SA			Q9DBG6	Dolichyl-diphosphooligosaccharide--protein glycosyltransferase subunit 2			Q61598	Rab GDP dissociation inhibitor beta			P08207	Protein S100-A10
Q01149	Collagen alpha-2(I) chain	P13020	Gelsolin			Q9DCV7	Keratin, type II cytoskeletal 7			P12023	Amyloid-beta A4 protein			Q9D1D4	Transmembrane emp24 domain-containing protein 10
P97351	40S ribosomal protein S3a	P68510	14-3-3 protein eta			Q5U405	Transmembrane protease serine 13			Q60605	Myosin light polypeptide 6			P84244	Histone H3.3
P51150	Ras-related protein Rab-7a	P20029	Endoplasmic reticulum chaperone BiP			Q9CZM2	60S ribosomal protein L15			Q6IRU2	Tropomyosin alpha-4 chain			P84228	Histone H3.2
Q9CZM2	60S ribosomal protein L15	Q8VHX6	Filamin-C			Q9CR57	60S ribosomal protein L14			Q9QUI0	Transforming protein RhoA			P68433	Histone H3.1
P42932	T-complex protein 1 subunit theta	P26040	Ezrin			Q8BP47	Asparagine--tRNA ligase, cytoplasmic			P11087	Collagen alpha-1(I) chain			P02301	Histone H3.3C
P28653	Biglycan	P84244	Histone H3.3			Q9CZN7	Serine hydroxymethyltransferase, mitochondrial			P14069	Protein S100-A6			P17047	Lysosome-associated membrane glycoprotein 2
P35700	Peroxiredoxin-1	P02301	Histone H3.3C			Q6ZWV3	60S ribosomal protein L10			Q9R0P3	S-formylglutathione hydrolase			O35639	Annexin A3
P68040	Receptor of activated protein C kinase 1	P97429	Annexin A4			P86048	60S ribosomal protein L10-like			P55065	Phospholipid transfer protein			P11276	Fibronectin
P43276	Histone H1.5	P84078	ADP-ribosylation factor 1			P62855	40S ribosomal protein S26			P08249	Malate dehydrogenase, mitochondrial			P14069	Protein S100-A6
P07091	Protein S100-A4	P61205	ADP-ribosylation factor 3			P60843	Eukaryotic initiation factor 4A-I			P26645	Myristoylated alanine-rich C-kinase substrate			Q99KF1	Transmembrane emp24 domain-containing protein 9
Q9DCN2	NADH-cytochrome b5 reductase 3	P06909	Complement factor H			P14131	40S ribosomal protein S16			P18242	Cathepsin D			Q01853	Transitional endoplasmic reticulum ATPase
P08113	Endoplasmin	P62908	40S ribosomal protein S3			P42932	T-complex protein 1 subunit theta			Q8BFR4	N-acetylglucosamine-6-sulfatase			Q9CQQ7	ATP synthase F(0) complex subunit B1, mitochondrial
P61979	Heterogeneous nuclear ribonucleoprotein K	Q9WVA4	Transgelin-2			P14115	60S ribosomal protein L27a			Q9D379	Epoxide hydrolase 1			Q3THW5	Histone H2A.V
P27659	60S ribosomal protein L3	Q60854	Serpin B6			P62830	60S ribosomal protein L23			P04104	Keratin, type II cytoskeletal 1			P0C0S6	Histone H2A.Z
P62242	40S ribosomal protein S8	Q99JY9	Actin-related protein 3			P62281	40S ribosomal protein S11			Q62261	Spectrin beta chain, non-erythrocytic 1			P26041	Moesin
Q9Z110	Delta-1-pyrroline-5-carboxylate synthase	P27773	Protein disulfide-isomerase A3			Q99LC5	Electron transfer flavoprotein subunit alpha, mitochondrial			P62880	Guanine nucleotide-binding protein G(I)/G(S)/G(T) subunit beta-2			P62242	40S ribosomal protein S8
P14206	40S ribosomal protein SA	Q9EQU5	Protein SET			Q9JKF1	Ras GTPase-activating-like protein IQGAP1			Q6ZQ38	Cullin-associated NEDD8-dissociated protein 1			P68510	14-3-3 protein eta
P17182	Alpha-enolase	P58771	Tropomyosin alpha-1 chain			Q91VR2	ATP synthase subunit gamma, mitochondrial			P26350	Prothymosin alpha			P58252	Elongation factor 2
P62702	40S ribosomal protein S4, X isoform	P62827	GTP-binding nuclear protein Ran			Q501J6	Probable ATP-dependent RNA helicase DDX17			Q01768	Nucleoside diphosphate kinase B			Q64433	10 kDa heat shock protein, mitochondrial
Q9CR57	60S ribosomal protein L14	P37889	Fibulin-2			Q99KI0	Aconitate hydratase, mitochondrial			P15532	Nucleoside diphosphate kinase A			P05064	Fructose-bisphosphate aldolase A
P80314	T-complex protein 1 subunit beta	P80313	T-complex protein 1 subunit eta			P09411	Phosphoglycerate kinase 1			P28654	Decorin			P19157	Glutathione S-transferase P 1
Q99PL5	Ribosome-binding protein 1	Q9Z1Q5	Chloride intracellular channel protein 1			Q61753	D-3-phosphoglycerate dehydrogenase			Q6GSS7	Histone H2A type 2-A			Q9R0X4	Acyl-coenzyme A thioesterase 9, mitochondrial
Q9D8N0	Elongation factor 1-gamma	Q9QYB1	Chloride intracellular channel protein 4			P62245	40S ribosomal protein S15a			Q64523	Histone H2A type 2-C			Q9CQW9	Interferon-induced transmembrane protein 3
P26443	Glutamate dehydrogenase 1, mitochondrial	P61982	14-3-3 protein gamma			Q8VEM8	Phosphate carrier protein, mitochondrial			Q64522	Histone H2A type 2-B			Q99P91	Transmembrane glycoprotein NMB
P20029	Endoplasmic reticulum chaperone BiP	Q9CQV8	14-3-3 protein beta/alpha			P61027	Ras-related protein Rab-10			Q62159	Rho-related GTP-binding protein RhoC			P62270	40S ribosomal protein S18
Q9CZN7	Serine hydroxymethyltransferase, mitochondrial	Q8BSL7	ADP-ribosylation factor 2			Q61696	Heat shock 70 kDa protein 1A			Q61508	Extracellular matrix protein 1			P52927	High mobility group protein HMGI-C
P41105	60S ribosomal protein L28	P97298	Pigment epithelium-derived factor			P17879	Heat shock 70 kDa protein 1B			P28656	Nucleosome assembly protein 1-like 1			P43277	Histone H1.3
Q61937	Nucleophosmin	Q01768	Nucleoside diphosphate kinase B			Q6NXH9	Keratin, type II cytoskeletal 73			P29387	Guanine nucleotide-binding protein subunit beta-4			P15864	Histone H1.2
P60335	Poly(rC)-binding protein 1	P63158	High mobility group protein B1			Q60715	Prolyl 4-hydroxylase subunit alpha-1			Q60854	Serpin B6			P67778	Prohibitin
Q01853	Transitional endoplasmic reticulum ATPase	P43277	Histone H1.3			Q3UV17	Keratin, type II cytoskeletal 2 oral			P33434	72 kDa type IV collagenase			O35682	Myeloid-associated differentiation marker
O54724	Caveolae-associated protein 1	P19096	Fatty acid synthase			Q9JIK5	Nucleolar RNA helicase 2			Q61805	Lipopolysaccharide-binding protein			Q61735	Leukocyte surface antigen CD47
P08752	Guanine nucleotide-binding protein G(i) subunit alpha-2	P80316	T-complex protein 1 subunit epsilon			Q3THW5	Histone H2A.V			P48678	Prelamin-A/C			Q91ZX7	Prolow-density lipoprotein receptor-related protein 1
P11087	Collagen alpha-1(I) chain	Q61553	Fascin			P0C0S6	Histone H2A.Z			Q9QYB1	Chloride intracellular channel protein 4			P84078	ADP-ribosylation factor 1
Q62465	Synaptic vesicle membrane protein VAT-1 homolog	P07091	Protein S100-A4			Q3TTY5	Keratin, type II cytoskeletal 2 epidermal			Q9D6P8	Calmodulin-like protein 3			P61205	ADP-ribosylation factor 3
Q9Z2X1	Heterogeneous nuclear ribonucleoprotein F	P08249	Malate dehydrogenase, mitochondrial			Q6PB66	Leucine-rich PPR motif-containing protein, mitochondrial			P0DP28	Calmodulin-3			Q6ZWN5	40S ribosomal protein S9
P14131	40S ribosomal protein S16	P10605	Cathepsin B			Q99K48	Non-POU domain-containing octamer-binding protein			P0DP27	Calmodulin-2			Q91V61	Sideroflexin-3
P80315	T-complex protein 1 subunit delta	Q76MZ3	Serine/threonine-protein phosphatase 2A 65 kDa regulatory subunit A alpha isoform			Q9CXW4	60S ribosomal protein L11			P0DP26	Calmodulin-1			Q9DBG6	Dolichyl-diphosphooligosaccharide--protein glycosyltransferase subunit 2
Q9CPR4	60S ribosomal protein L17	P80317	T-complex protein 1 subunit zeta			P14211	Calreticulin			Q922U2	Keratin, type II cytoskeletal 5			O88783	Coagulation factor V
P62754	40S ribosomal protein S6	P11983	T-complex protein 1 subunit alpha			P61979	Heterogeneous nuclear ribonucleoprotein K			Q6IFZ6	Keratin, type II cytoskeletal 1b			P26443	Glutamate dehydrogenase 1, mitochondrial
P61750	ADP-ribosylation factor 4	P17742	Peptidyl-prolyl cis-trans isomerase A			Q9Z204	Heterogeneous nuclear ribonucleoproteins C1/C2			P11679	Keratin, type II cytoskeletal 8			Q9CQ19	Myosin regulatory light polypeptide 9
Q99KI0	Aconitate hydratase, mitochondrial	P68254	14-3-3 protein theta			Q9D0I9	Arginine--tRNA ligase, cytoplasmic			Q61398	Procollagen C-endopeptidase enhancer 1			P14148	60S ribosomal protein L7
P11983	T-complex protein 1 subunit alpha	Q99JR5	Tubulointerstitial nephritis antigen-like			P14206	40S ribosomal protein SA			P50543	Protein S100-A11			P19221	Prothrombin
Q9R0P3	S-formylglutathione hydrolase	Q61316	Heat shock 70 kDa protein 4			P62264	40S ribosomal protein S14			P25785	Metalloproteinase inhibitor 2			Q8BMK4	Cytoskeleton-associated protein 4
Q9CZD3	Glycine--tRNA ligase	Q99K51	Plastin-3			Q61656	Probable ATP-dependent RNA helicase DDX5			P17751	Triosephosphate isomerase			O35129	Prohibitin-2
P09405	Nucleolin	Q3THW5	Histone H2A.V			P00405	Cytochrome c oxidase subunit 2			P17047	Lysosome-associated membrane glycoprotein 2			P43274	Histone H1.4
P35278	Ras-related protein Rab-5C	P0C0S6	Histone H2A.Z			P35979	60S ribosomal protein L12			P19324	Serpin H1			P10852	4F2 cell-surface antigen heavy chain
Q69ZN7	Myoferlin	P15532	Nucleoside diphosphate kinase A			O55143	Sarcoplasmic/endoplasmic reticulum calcium ATPase 2			Q9EQH3	Vacuolar protein sorting-associated protein 35			Q62383	Transcription elongation factor SPT6
P97461	40S ribosomal protein S5	P70696	Histone H2B type 1-A			P97351	40S ribosomal protein S3a			Q9D0J8	Parathymosin			Q9QXS1	Plectin
Q8BG05	Heterogeneous nuclear ribonucleoprotein A3	P15864	Histone H1.2			Q8CIE6	Coatomer subunit alpha			Q9QXS1	Plectin			P00405	Cytochrome c oxidase subunit 2
Q99LC5	Electron transfer flavoprotein subunit alpha, mitochondrial	P62880	Guanine nucleotide-binding protein G(I)/G(S)/G(T) subunit beta-2			P62900	60S ribosomal protein L31			Q8CG14	Complement C1s-A subcomponent
O88569	Heterogeneous nuclear ribonucleoproteins A2/B1	P63001	Ras-related C3 botulinum toxin substrate 1			P17225	Polypyrimidine tract-binding protein 1			Q99L47	Hsc70-interacting protein
P57776	Elongation factor 1-delta	Q9DBJ1	Phosphoglycerate mutase 1			Q8BP67	60S ribosomal protein L24			Q61753	D-3-phosphoglycerate dehydrogenase
O88322	Nidogen-2	P35979	60S ribosomal protein L12			P67984	60S ribosomal protein L22			Q9Z1Q5	Chloride intracellular channel protein 1
Q8BGQ7	Alanine--tRNA ligase, cytoplasmic	Q08879	Fibulin-1			P62267	40S ribosomal protein S23			P63038	60 kDa heat shock protein, mitochondrial
P19253	60S ribosomal protein L13a	P08752	Guanine nucleotide-binding protein G(i) subunit alpha-2			Q9D1R9	60S ribosomal protein L34			Q8VED5	Keratin, type II cytoskeletal 79
O70318	Band 4.1-like protein 2	P60335	Poly(rC)-binding protein 1			Q60931	Voltage-dependent anion-selective channel protein 3			Q9CQW9	Interferon-induced transmembrane protein 3
Q8VEK3	Heterogeneous nuclear ribonucleoprotein U	Q9JHU4	Cytoplasmic dynein 1 heavy chain 1			Q60932	Voltage-dependent anion-selective channel protein 1			P29699	Alpha-2-HS-glycoprotein
Q64727	Vinculin	O88342	WD repeat-containing protein 1			Q9JHU4	Cytoplasmic dynein 1 heavy chain 1			Q61316	Heat shock 70 kDa protein 4
O35737	Heterogeneous nuclear ribonucleoprotein H	P40142	Transketolase			Q91YQ5	Dolichyl-diphosphooligosaccharide--protein glycosyltransferase subunit 1			P43277	Histone H1.3
Q9D1G1	Ras-related protein Rab-1B	O88844	Isocitrate dehydrogenase [NADP] cytoplasmic			P62301	40S ribosomal protein S13			P43274	Histone H1.4
P51410	60S ribosomal protein L9	P80315	T-complex protein 1 subunit delta			P80314	T-complex protein 1 subunit beta			P15864	Histone H1.2
Q6ZWV3	60S ribosomal protein L10	Q9QUI0	Transforming protein RhoA			O55142	60S ribosomal protein L35a			Q6GQT1	Alpha-2-macroglobulin-P
P86048	60S ribosomal protein L10-like	Q9EPL8	Importin-7			P08249	Malate dehydrogenase, mitochondrial
P13020	Gelsolin	Q61598	Rab GDP dissociation inhibitor beta			P97315	Cysteine and glycine-rich protein 1
O70475	UDP-glucose 6-dehydrogenase	Q03265	ATP synthase subunit alpha, mitochondrial			Q99JI6	Ras-related protein Rap-1b
P62830	60S ribosomal protein L23	P07214	SPARC			P62835	Ras-related protein Rap-1A
Q9WVA4	Transgelin-2	Q02248	Catenin beta-1			Q60605	Myosin light polypeptide 6
P62827	GTP-binding nuclear protein Ran	Q91VI7	Ribonuclease inhibitor			Q8VEK3	Heterogeneous nuclear ribonucleoprotein U
P18760	Cofilin-1	P68040	Receptor of activated protein C kinase 1			P19253	60S ribosomal protein L13a
P14115	60S ribosomal protein L27a	P60843	Eukaryotic initiation factor 4A-I			P03995	Glial fibrillary acidic protein
P10922	Histone H1.0	Q3THE2	Myosin regulatory light chain 12B			Q61024	Asparagine synthetase [glutamine-hydrolyzing]
P62301	40S ribosomal protein S13	Q9CQ19	Myosin regulatory light polypeptide 9			O09167	60S ribosomal protein L21
P62962	Profilin-1	Q02053	Ubiquitin-like modifier-activating enzyme 1			Q9D0E1	Heterogeneous nuclear ribonucleoprotein M
Q8BP67	60S ribosomal protein L24	P57776	Elongation factor 1-delta			Q64282	Interferon-induced protein with tetratricopeptide repeats 1
P60766	Cell division control protein 42 homolog	P25785	Metalloproteinase inhibitor 2			Q05793	Basement membrane-specific heparan sulfate proteoglycan core protein
P06151	L-lactate dehydrogenase A chain	Q922R8	Protein disulfide-isomerase A6			Q91YH5	Atlastin-3
P50543	Protein S100-A11	Q62000	Mimecan
P62264	40S ribosomal protein S14	P16546	Spectrin alpha chain, non-erythrocytic 1
Q922U2	Keratin, type II cytoskeletal 5	P21107	Tropomyosin alpha-3 chain
P54071	Isocitrate dehydrogenase [NADP], mitochondrial	P61750	ADP-ribosylation factor 4
Q9CXW4	60S ribosomal protein L11	P43274	Histone H1.4
P84099	60S ribosomal protein L19	P80318	T-complex protein 1 subunit gamma
Q8VEM8	Phosphate carrier protein, mitochondrial	P11679	Keratin, type II cytoskeletal 8
P61358	60S ribosomal protein L27	P60764	Ras-related C3 botulinum toxin substrate 3
Q8BP47	Asparagine--tRNA ligase, cytoplasmic	Q05144	Ras-related C3 botulinum toxin substrate 2
P62880	Guanine nucleotide-binding protein G(I)/G(S)/G(T) subunit beta-2	Q62159	Rho-related GTP-binding protein RhoC
Q9QWL7	Keratin, type I cytoskeletal 17	P14131	40S ribosomal protein S16
Q61781	Keratin, type I cytoskeletal 14	P10630	Eukaryotic initiation factor 4A-II
P19157	Glutathione S-transferase P 1	P08121	Collagen alpha-1(III) chain
Q99JI6	Ras-related protein Rap-1b	Q60605	Myosin light polypeptide 6
P62835	Ras-related protein Rap-1A	P61027	Ras-related protein Rab-10
P62259	14-3-3 protein epsilon	O08529	Calpain-2 catalytic subunit
P35564	Calnexin	P50543	Protein S100-A11
O35129	Prohibitin-2	Q93092	Transaldolase
P53994	Ras-related protein Rab-2A	P14148	60S ribosomal protein L7
Q6ZWY3	40S ribosomal protein S27-like	P63038	60 kDa heat shock protein, mitochondrial
P80318	T-complex protein 1 subunit gamma	P84091	AP-2 complex subunit mu
P62918	60S ribosomal protein L8	P60867	40S ribosomal protein S20
Q9QUI0	Transforming protein RhoA	Q8BG05	Heterogeneous nuclear ribonucleoprotein A3
P04104	Keratin, type II cytoskeletal 1	Q9R118	Serine protease HTRA1
Q61990	Poly(rC)-binding protein 2	Q9DCD0	6-phosphogluconate dehydrogenase, decarboxylating
Q61768	Kinesin-1 heavy chain	Q3TW96	UDP-N-acetylhexosamine pyrophosphorylase-like protein 1
O08553	Dihydropyrimidinase-related protein 2	P09103	Protein disulfide-isomerase
P16045	Galectin-1	Q8CGR5	Kallikrein-14
P61982	14-3-3 protein gamma	O55234	Proteasome subunit beta type-5
P42208	Septin-2	Q9WV32	Actin-related protein 2/3 complex subunit 1B
P62137	Serine/threonine-protein phosphatase PP1-alpha catalytic subunit	P12970	60S ribosomal protein L7a
P62141	Serine/threonine-protein phosphatase PP1-beta catalytic subunit	P19788	Matrix Gla protein
P63087	Serine/threonine-protein phosphatase PP1-gamma catalytic subunit	Q99PT1	Rho GDP-dissociation inhibitor 1
Q922Q8	Leucine-rich repeat-containing protein 59	P08207	Protein S100-A10
P62245	40S ribosomal protein S15a	P97447	Four and a half LIM domains protein 1
Q91VR2	ATP synthase subunit gamma, mitochondrial	P14211	Calreticulin
Q91V41	Ras-related protein Rab-14	P99027	60S acidic ribosomal protein P2
P70333	Heterogeneous nuclear ribonucleoprotein H2	Q6ZWN5	40S ribosomal protein S9
Q3V3R1	Monofunctional C1-tetrahydrofolate synthase, mitochondrial	Q9CWJ9	Bifunctional purine biosynthesis protein PURH
P62821	Ras-related protein Rab-1A	P35278	Ras-related protein Rab-5C
Q5U405	Transmembrane protease serine 13	P60766	Cell division control protein 42 homolog
P63101	14-3-3 protein zeta/delta	P61161	Actin-related protein 2
Q61820	GTP-binding nuclear protein Ran, testis-specific isoform	P17047	Lysosome-associated membrane glycoprotein 2
Q8R527	Rho-related GTP-binding protein RhoQ	Q99K85	Phosphoserine aminotransferase
P46425	Glutathione S-transferase P 2	Q5U405	Transmembrane protease serine 13
P62281	40S ribosomal protein S11	P53026	60S ribosomal protein L10a
Q6ZWU9	40S ribosomal protein S27	P0DP28	Calmodulin-3
Q3TW96	UDP-N-acetylhexosamine pyrophosphorylase-like protein 1	P0DP27	Calmodulin-2
P26041	Moesin	P0DP26	Calmodulin-1
P26043	Radixin	Q9D6P8	Calmodulin-like protein 3
P26040	Ezrin	Q64669	NAD(P)H dehydrogenase [quinone] 1
Q8BMK4	Cytoskeleton-associated protein 4	O08553	Dihydropyrimidinase-related protein 2
O35640	Annexin A8	P97427	Dihydropyrimidinase-related protein 1
P80313	T-complex protein 1 subunit eta	Q6IFZ6	Keratin, type II cytoskeletal 1b
P29341	Polyadenylate-binding protein 1	Q61805	Lipopolysaccharide-binding protein
Q62159	Rho-related GTP-binding protein RhoC	Q61024	Asparagine synthetase [glutamine-hydrolyzing]
P62889	60S ribosomal protein L30	O70318	Band 4.1-like protein 2
P57722	Poly(rC)-binding protein 3	Q80XB4	Nebulin-related-anchoring protein
P60867	40S ribosomal protein S20
Q08093	Calponin-2
P62849	40S ribosomal protein S24
P48036	Annexin A5
P35979	60S ribosomal protein L12
Q9DCW4	Electron transfer flavoprotein subunit beta
Q99PT1	Rho GDP-dissociation inhibitor 1
Q99020	Heterogeneous nuclear ribonucleoprotein A/B
Q640N1	Adipocyte enhancer-binding protein 1
Q62167	ATP-dependent RNA helicase DDX3X
Q62095	ATP-dependent RNA helicase DDX3Y
P16381	Putative ATP-dependent RNA helicase Pl10
Q60605	Myosin light polypeptide 6
Q3THE2	Myosin regulatory light chain 12B
P62852	40S ribosomal protein S25
P62717	60S ribosomal protein L18a
P33175	Kinesin heavy chain isoform 5A
P28738	Kinesin heavy chain isoform 5C
Q9D6R2	Isocitrate dehydrogenase [NAD] subunit alpha, mitochondrial
Q8BH04	Phosphoenolpyruvate carboxykinase [GTP], mitochondrial
P63325	40S ribosomal protein S10
Q8BMS1	Trifunctional enzyme subunit alpha, mitochondrial
Q02053	Ubiquitin-like modifier-activating enzyme 1
P62855	40S ribosomal protein S26
Q99L47	Hsc70-interacting protein
P17710	Hexokinase-1
P62071	Ras-related protein R-Ras2
Q8VIJ6	Splicing factor, proline- and glutamine-rich
Q3U0V1	Far upstream element-binding protein 2
Q8BMF4	Dihydrolipoyllysine-residue acetyltransferase component of pyruvate dehydrogenase complex, mitochondrial
O70133	ATP-dependent RNA helicase A
P62911	60S ribosomal protein L32
P67778	Prohibitin
P62984	Ubiquitin-60S ribosomal protein L40
P62983	Ubiquitin-40S ribosomal protein S27a
P0CG50	Polyubiquitin-C
P0CG49	Polyubiquitin-B
P61255	60S ribosomal protein L26
P67984	60S ribosomal protein L22
Q9DCH4	Eukaryotic translation initiation factor 3 subunit F
Q9WU78	Programmed cell death 6-interacting protein
Q9DB20	ATP synthase subunit O, mitochondrial
Q6ZQ38	Cullin-associated NEDD8-dissociated protein 1
P09411	Phosphoglycerate kinase 1
Q5XJY5	Coatomer subunit delta
O08529	Calpain-2 catalytic subunit
Q9WV55	Vesicle-associated membrane protein-associated protein A
Q922R8	Protein disulfide-isomerase A6
Q99JI4	26S proteasome non-ATPase regulatory subunit 6
Q8VED5	Keratin, type II cytoskeletal 79
Q9Z2K1	Keratin, type I cytoskeletal 16
P68254	14-3-3 protein theta
Q9EST5	Acidic leucine-rich nuclear phosphoprotein 32 family member B
Q6PB66	Leucine-rich PPR motif-containing protein, mitochondrial
Q99JY9	Actin-related protein 3
Q05144	Ras-related C3 botulinum toxin substrate 2
P63001	Ras-related C3 botulinum toxin substrate 1
P60764	Ras-related C3 botulinum toxin substrate 3
Q9DAW9	Calponin-3
P54728	UV excision repair protein RAD23 homolog B
E9PVA8	eIF-2-alpha kinase activator GCN1
Q9CZU6	Citrate synthase, mitochondrial
Q9DCL9	Multifunctional protein ADE2
P60229	Eukaryotic translation initiation factor 3 subunit E
Q3THW5	Histone H2A.V
P0C0S6	Histone H2A.Z
Q9CQV8	14-3-3 protein beta/alpha
P68510	14-3-3 protein eta
Q80XB4	Nebulin-related-anchoring protein

## Sheet: Total
Q9QXS1
Q8VDD5
P63260
P60710
P11276
Q8BTM8
P62737
P68033
P20152
Q80X90
P10126
P99024
Q68FD5
P68372
P11499
P05213
Q7TMM9
Q9CWF2
Q05793
P68373
P68369
P62806
P48678
P26039
P58252
P16858
P16546
Q8VHX6
P05214
P10107
Q62261
P84228
Q922F4
P52480
P63038
Q8CGP2
Q8CGP1
Q64525
Q64478
Q64475
P10854
P10853
Q6ZWY9
P07356
P38647
Q9JHU4
P48962
Q9JJZ2
Q9WTI7
P47738
Q8CGP7
Q8CGP6
Q8CGP5
Q8BFU2
Q64523
C0HKE9
C0HKE8
C0HKE7
C0HKE6
C0HKE5
C0HKE4
C0HKE3
C0HKE2
C0HKE1
Q6GSS7
Q03265
P19324
P63017
P27661
Q8R1M2
P68433
P07901
Q64522
P51881
P56480
P62908
P84244
P02301
P14148
P43277
P21981
Q9JKF1
P60843
P23116
Q61753
Q9D8E6
Q7TPR4
Q91VI7
P12970
P47963
P47911
Q6ZWN5
P62270
P14869
P43274
P15864
P25444
P57780
P70168
P35980
Q01149
P97351
P51150
Q9CZM2
P42932
P28653
P35700
P68040
P43276
P07091
Q9DCN2
P08113
P61979
P27659
P62242
Q9Z110
P14206
P17182
P62702
Q9CR57
P80314
Q99PL5
Q9D8N0
P26443
P20029
Q9CZN7
P41105
Q61937
P60335
Q01853
O54724
P08752
P11087
Q62465
Q9Z2X1
P14131
P80315
Q9CPR4
P62754
P61750
Q99KI0
P11983
Q9R0P3
Q9CZD3
P09405
P35278
Q69ZN7
P97461
Q8BG05
Q99LC5
O88569
P57776
O88322
Q8BGQ7
P19253
O70318
Q8VEK3
Q64727
O35737
Q9D1G1
P51410
Q6ZWV3
P86048
P13020
O70475
P62830
Q9WVA4
P62827
P18760
P14115
P10922
P62301
P62962
Q8BP67
P60766
P06151
P50543
P62264
Q922U2
P54071
Q9CXW4
P84099
Q8VEM8
P61358
Q8BP47
P62880
Q9QWL7
Q61781
P19157
Q99JI6
P62835
P62259
P35564
O35129
P53994
Q6ZWY3
P80318
P62918
Q9QUI0
P04104
Q61990
Q61768
O08553
P16045
P61982
P42208
P62137
P62141
P63087
Q922Q8
P62245
Q91VR2
Q91V41
P70333
Q3V3R1
P62821
Q5U405
P63101
Q61820
Q8R527
P46425
P62281
Q6ZWU9
Q3TW96
P26041
P26043
P26040
Q8BMK4
O35640
P80313
P29341
Q62159
P62889
P57722
P60867
Q08093
P62849
P48036
P35979
Q9DCW4
Q99PT1
Q99020
Q640N1
Q62167
Q62095
P16381
Q60605
Q3THE2
P62852
P62717
P33175
P28738
Q9D6R2
Q8BH04
P63325
Q8BMS1
Q02053
P62855
Q99L47
P17710
P62071
Q8VIJ6
Q3U0V1
Q8BMF4
O70133
P62911
P67778
P62984
P62983
P0CG50
P0CG49
P61255
P67984
Q9DCH4
Q9WU78
Q9DB20
Q6ZQ38
P09411
Q5XJY5
O08529
Q9WV55
Q922R8
Q99JI4
Q8VED5
Q9Z2K1
P68254
Q9EST5
Q6PB66
Q99JY9
Q05144
P63001
P60764
Q9DAW9
P54728
E9PVA8
Q9CZU6
Q9DCL9
P60229
Q3THW5
P0C0S6
Q9CQV8
P68510
Q80XB4
P68134
P63268
Q61554
Q9D2U9
Q8CGP0
Q64524
P28654
Q61508
Q9QZF2
Q920A5
Q61207
P05064
P07724
P33434
P55065
Q61398
P14069
P47962
P40124
P97429
P84078
P61205
P06909
Q60854
P27773
Q9EQU5
P58771
P37889
Q9Z1Q5
Q9QYB1
Q8BSL7
P97298
Q01768
P63158
P19096
P80316
Q61553
P08249
P10605
Q76MZ3
P80317
P17742
Q99JR5
Q61316
Q99K51
P15532
P70696
Q9DBJ1
Q08879
O88342
P40142
O88844
Q9EPL8
Q61598
P07214
Q02248
Q9CQ19
P25785
Q62000
P21107
P11679
P10630
P08121
P61027
Q93092
P84091
Q9R118
Q9DCD0
P09103
Q8CGR5
O55234
Q9WV32
P19788
P08207
P97447
P14211
P99027
Q9CWJ9
P61161
P17047
Q99K85
P53026
P0DP28
P0DP27
P0DP26
Q9D6P8
Q64669
P97427
Q6IFZ6
Q61805
Q61024
Q6IRU2
P58774
P99026
Q9QUM9
P18242
Q02819
Q9Z2U1
Q6GQT1
O70435
P14152
P26350
Q9R1P1
P61089
P17751
Q9D0J8
Q91W10
Q60817
P70670
Q61879
Q7TPV4
Q8CGC7
P02535
Q9D0K2
P08074
Q9DBG6
Q9DCV7
Q501J6
Q61696
P17879
Q6NXH9
Q60715
Q3UV17
Q9JIK5
Q3TTY5
Q99K48
Q9Z204
Q9D0I9
Q61656
P00405
O55143
Q8CIE6
P62900
P17225
P62267
Q9D1R9
Q60931
Q60932
Q91YQ5
O55142
P97315
P03995
O09167
Q9D0E1
Q64282
Q91YH5
P21550
Q9D379
P11438
P01942
P01027
P08003
Q61147
P06745
P84084
Q9WV54
P12023
P26645
Q8BFR4
P28656
P29387
Q9EQH3
Q8CG14
Q9CQW9
P29699
P07141
Q8VHY0
Q91ZX7
Q9R1P4
P49722
Q9Z2U0
O09061
Q8CG16
Q9R1P0
P40240
Q60930
P68368
Q64133
P39876
P02089
P02088
O54734
Q9DCX2
Q99P72
P12787
Q9CZ13
Q9DB77
Q9D1D4
O35639
Q99KF1
Q9CQQ7
Q64433
Q9R0X4
Q99P91
P52927
O35682
Q61735
Q91V61
O88783
P19221
P10852
Q62383

## Sheet: Sheet2
Common elements in 2D 2.6k 3D 2.6k 2D 16k 3D 16k 2D EXO 3D EXO :							Common elements in 3T3 PCL3T3 2D 16k 3D 16k :							Common elements in 3T3 PCL3T3 2D 2.6k 3D 2.6K :							Common elements in 3T3 PCL3T3 2D EXO 3D EXO :
P63260							Q8VDD5							Q8VDD5							P11276
P60710							P11276							P11276							P63260
P11276							P63260							P63260							P20152
P62737							Q9QXS1							P20152							P68033
P68033							P20152							P68033							P62737
P20152							P68033							P62737							P68134
P48678							P62737							P05213							P63268
P58252							P68134							P68369							P07356
P52480							P05213							P99024							P17182
P07356							P68369							Q68FD5							P52480
P63017							P99024							P68373							P48678
P17182							P63268							P11499							P27773
Q64727							P11499							P10126							P58252
							P10126							P07356							P63017
							P07356							P56480							P09411
							P62806							P62806							P08249
							P27661							Q03265
							Q6ZWY9							P48962
							Q64525							P27661
							Q64478							Q6ZWY9
							P10854							Q64525
							Q8CGP1							Q64478
							Q64475							P10854
							P10853							Q8CGP1
							Q64522							Q64475
							Q8CGP2							P10853
							P17182							P84228
							P08113							Q64522
							P19324							Q8CGP2
							Q6GSS7							P17182
							Q64523							P08113
							P16858							Q6GSS7
							P52480							Q64523
							P63038							P16858
							P10107							P52480
							P48678							P63038
							P20029							P38647
							P15864							P10107
							P43277							P47738
							P27773							P48678
							P58252							P20029
							P63017							Q9DCN2
							P09411							P58252
							P14211							P63017
							P08249							Q8VEM8
							Q60605

## Sheet: Sheet3
2D vs 3D				2D				3D						3D vs 2D
2.6k	16k	exo		2.6k	16k	exo		2.6k	16k	exo				P01027
Q8VDD5	P11276	P60710		Q922F4	Q61554	P99026		Q60932	P08003	P07141				P28653
P63260	P11087	P63260		Q9JJZ2	Q9QZF2	Q9Z2U1		P21550	P02535	Q8VHY0				Q8VDD5
P60710	P63260	P11276		P51881	P47962	O70435		P01942	P06745	Q91ZX7				Q61147
P11276	P60710	P11087		P23116	P06909	P14152			P84084	Q9R1P4				P97298
Q8BTM8	Q05793	P20152		Q9D8E6	P37889	Q9R1P1			Q9WV54	P49722				P20029
P62737	Q01149	P63017		P47963	P19096	P61089			P12023	Q9Z2U0				P28654
P68033	P68033	P07724		P47911	P80316	Q91W10			P26645	O09061				P07141
P20152	P68134	P26041		P62270	Q61553	Q60817			Q8BFR4	Q8CG16				Q8VHY0
Q80X90	P20152	P68134		P35980	Q76MZ3	P70670			P28656	Q9R1P0				Q8BTM8
P10126	P62737	P68033		P97351	P80317				P29387	P40240				Q91ZX7
P99024	P63268	P63268		P51150	Q99JR5				Q9EQH3					P26040
Q68FD5	P58252	P62737		Q9CZM2	P70696				Q8CG14					Q61805
P68372	Q8VDD5	P62259		P42932	Q08879				Q9CQW9					Q01853
P11499	P10126	P16045		P43276	O88342				P29699					Q9R1P4
P05213	P11499	Q6IRU2		P61979	P40142									P49722
P68373	P52480	P58771		P27659	O88844									O55234
P68369	P63017	P58252		P62242	Q9EPL8									Q9Z2U0
P62806	P07356	Q7TPR4		Q9Z110	Q02248									P11438
P48678	Q8BTM8	P63101		P62702	Q9CQ19									O09061
P58252	P99024	Q64727		Q9CR57	P10630									P16858
P16858	Q80X90	Q01768		Q99PL5	P08121									P26443
P10107	P27661	P57780		Q9D8N0	P61027									Q99K51
P84228	P62806	P07214		Q9CZN7	Q93092									P68373
P52480	Q6ZWY9	P52480		P41105	P84091									P68369
P63038	Q8CGP2	P06151		O54724	Q9R118									P05214
Q8CGP2	Q8CGP1	P09103		Q9Z2X1	Q9DCD0									P05213
Q8CGP1	Q64475	Q61207		Q9CPR4	Q8CGR5									Q8CG16
Q64525	P10853	P61982		P62754	Q9WV32									Q9R1P0
Q64478	Q64525	P58774		Q99KI0	P19788									P33434
Q64475	Q64478	P27773		Q9CZD3	P08207									P25785
P10854	P10854	P21107		P97461	P97447									Q9QXS1
P10853	Q9QXS1	P0DP28		Q99LC5	P99027									P40240
Q6ZWY9	Q6GSS7	P0DP27		O88569	Q9CWJ9									Q5U405
P07356	Q64523	P0DP26		Q8BGQ7	P61161
P38647	Q64522	Q9CQV8		P19253	Q99K85
P48962	P05213	P05064		O35737	P53026
P47738	Q7TPR4	Q9DBJ1		Q9D1G1	Q64669
Q8CGP7	P16858	P17182		P51410	P97427
Q8CGP6	Q01853	P48678		Q6ZWV3	Q61024
Q8CGP5	Q9D2U9	P08249		P86048
Q8BFU2	Q8CGP0	P07356		O70475
Q64523	Q64524	Q61508		P62830
C0HKE9	P07901	Q9QUM9		P14115
C0HKE8	P68369	P18242		P10922
C0HKE7	P48678	Q02819		P62301
C0HKE6	P06151	Q6GQT1		Q8BP67
C0HKE5	P28654	P10605		P62264
C0HKE4	P17182	P55065		P54071
C0HKE3	P26041	P17751		P84099
C0HKE2	P28653	P09411		P61358
C0HKE1	P10107			Q8BP47
Q6GSS7	Q61508			Q9QWL7
Q03265	P57780			Q61781
P63017	Q62261			P19157
P27661	Q64727			Q99JI6
Q8R1M2	Q9JKF1			P62835
P07901	P16045			O35129
Q64522	Q920A5			P53994
P56480	Q61207			Q6ZWY3
P21981	P05064			P62918
Q6ZWN5	P63101			Q61990
P25444	P19324			Q61768
Q9DCN2	P48036			P42208
P08113	P09411			P62137
P17182	Q62465			P62141
P20029	P08113			P63087
Q61937	P07724			Q922Q8
Q01853	P33434			P62245
P09405	P55065			Q91V41
Q69ZN7	Q61398			P70333
Q8VEK3	P18760			Q3V3R1
Q64727	P14069			P62821
Q9CXW4	Q6ZQ38			Q61820
Q8VEM8	P62962			Q8R527
P35564	P62259			P46425
Q91VR2	P68510			P62281
Q8BMK4	P20029			Q6ZWU9
P48036	P97429			P26043
P62984	P84078			O35640
P62983	P61205			P29341
P0CG50	Q60854			P62889
P0CG49	P27773			P57722
P68254	Q9Z1Q5			Q08093
	Q9QYB1			P62849
	P61982			Q9DCW4
	Q9CQV8			Q99020
	Q8BSL7			Q62167
	P97298			Q62095
	Q01768			P16381
	P43277			P62852
	P08249			P62717
	P10605			P33175
	P68254			P28738
	Q61316			Q9D6R2
	P15532			Q8BH04
	P15864			P63325
	P62880			Q8BMS1
	Q9DBJ1			P62855
	Q9QUI0			P17710
	Q61598			P62071
	P07214			Q8VIJ6
	P25785			Q3U0V1
	P43274			Q8BMF4
	P11679			O70133
	Q62159			P62911
	Q60605			P67778
	P50543			P61255
	P63038			P67984
	P09103			Q9DCH4
	P14211			Q9WU78
	P17047			Q9DB20
	Q5U405			Q5XJY5
	P0DP28			Q9WV55
	P0DP27			Q99JI4
	P0DP26			Q9Z2K1
	Q9D6P8			Q9EST5
	Q6IFZ6			Q6PB66
	Q61805			Q9DAW9
				P54728
				E9PVA8
				Q9CZU6
				Q9DCL9
				P60229
